# Supplementary material for: Exosomes are involved in iron transport from human blood–brain barrier endothelial cells and are modified by endothelial cell iron status
Source: PubMed Central journal article supplement (PMC9929479; doi:10.1016/j.jbc.2022.102868), 2023-01-03

Supplementary Figure 1

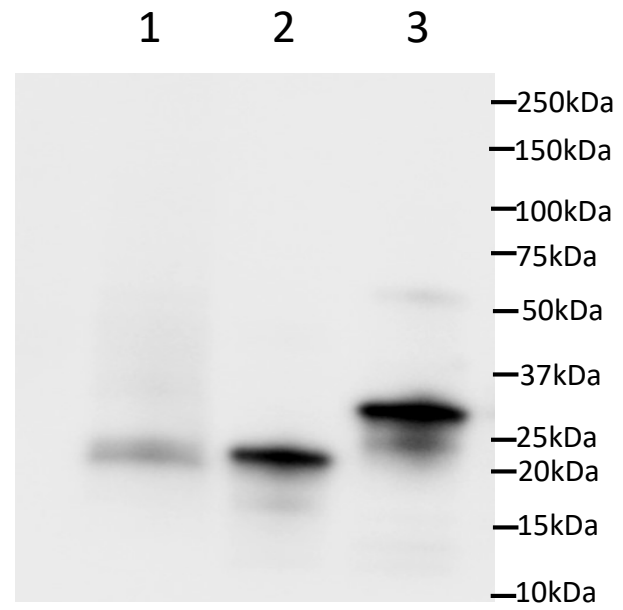

Supplement: mmc1.pdf [file mmc1.pdf]
